# Supplementary material for: Transition steps in peroxide reduction and a molecular switch for peroxide robustness of prokaryotic peroxiredoxins
Source: PubMed Central journal article supplement (PMC5124861; doi:10.1038/srep37610), 2016-11-28
Supplement: srep37610-s1.pdf [file srep37610-s1.pdf]

**Transition steps in peroxide reduction and a molecular switch for peroxide robustness of prokaryotic peroxiredoxins**

Neelagandan Kamariah<sup>a,#</sup>, Mun Foong Sek<sup>b,#</sup>, Birgit Eisenhaber<sup>a</sup>, Frank Eisenhaber<sup>a,c,d</sup> and Gerhard Grüber<sup>a,b,\*</sup>

<sup>a</sup> Bioinformatics Institute, Agency for Science, Technology and Research (A\*STAR), 30 Biopolis Street, #07-01 Matrix, Singapore 138671, Republic of Singapore

<sup>b</sup> School of Biological Sciences, Nanyang Technological University, 60 Nanyang Drive, Singapore 637551, Republic of Singapore

<sup>c</sup> School of Computer Engineering, Nanyang Technological University (NTU), 50 Nanyang Drive, Singapore 637553, Republic of Singapore

<sup>d</sup> Department of Biological Sciences, National University of Singapore, 8 Medical Drive, Singapore 117597, Republic of Singapore

# Authors contributed equally to this work

\* To whom correspondence may be addressed:

Prof. Dr. Gerhard Grüber, Tel.: + 65 - 6316 2989; Fax: + 65 - 6791 3856

E-mail: [ggrueber@ntu.edu.sg](mailto:ggrueber@ntu.edu.sg)

**Keywords:** Reactive oxygen species, redox homeostasis, oxidative stress, peroxiredoxins, alkyl hydroperoxide reductase, molecular switch

**Supplementary Figure S1.** (A) Comparison of the ten subunits (chains A-J) of decameric oxidized *EcAhpC*<sub>1-186</sub>-YFSKHN. Each subunit is shown with different color and the C<sub>P47</sub> adopts LU conformation in all subunits. The C-terminal tail is not shown for clarity. (B) The dimeric unit (chain A and B: shown in dark and light colors) shows that the C-terminal tail of chain A is stabilized in the oxidized *EcAhpC*<sub>1-186</sub>-YFSKHN structure by the packing interactions with the symmetry related molecule (grey color). (C) The C-terminus of chain H is stabilized by the packing interactions with the symmetry related molecule. Similarly, the C-terminal tail in chain G and J are also stabilized by packing interactions.

**Supplementary Figure S2.** (A) Comparison of the active site conformations between the ten subunits (chains A-J) of decameric reduced *EcAhpC*<sub>1-186</sub>-YFSKHN. Each subunit are shown with different color and the C-terminal tail is not shown for clarity. The C<sub>P47</sub> adopts two different conformation; in one subunit (chain A; red) the C<sub>P47</sub> adopts a loop conformation and chains B-J adopt helical conformation. The influence of crystal packing interactions on the active site conformation for (B) chain A and (C) G is shown as a representative for the rest of the subunits in the decameric reduced *EcAhpC*<sub>1-186</sub>-YFSKHN. No symmetry related molecule is in contact with the C<sub>P47</sub> of the reduced structure.

**Supplementary Figure S3.** Non-reducing SDS-PAGE analysis of oxidation of (A) WT *EcAhpC*, (B) *EcAhpC*<sub>1-172</sub> and (C) *EcAhpC*<sub>1187G</sub> by H<sub>2</sub>O<sub>2</sub>. The reduced AhpC proteins were treated with varying H<sub>2</sub>O<sub>2</sub> concentrations (0 to 30 mM) for 5 min. The SDS-PAGE analysis shows that the reduced AhpC proteins without H<sub>2</sub>O<sub>2</sub> run as a major band corresponding to a monomer (*Lane 1*). At 0.1 mM of H<sub>2</sub>O<sub>2</sub> *EcAhpC* becomes oxidized and undergoes the transition from a monomer to

a dimer (*Lane 2*). The monomer band reappears with high concentrations of H<sub>2</sub>O<sub>2</sub> (1 to 30 mM) likely due to over-oxidized *EcAhpC*. The analysis supports that *EcAhpC*<sub>1-172</sub> and *EcAhpC*<sub>1187G</sub> were sensitive to over-oxidation compared to WT *EcAhpC*. *D* indicates the dimeric and *M* the monomeric state.

**Supplementary Figure S4.** Comparison of interaction patterns of the reactive C<sub>p47</sub> with the conserved active site residues between the typical FF (left panel; PDB ID: 4MA9) and FF<sub>like</sub> (right panel) conformations. A shift in C<sub>p47</sub>, located at helix  $\alpha$ <sub>2</sub> of the FF<sub>like</sub> active site of reduced *EcAhpC*<sub>1-186</sub>-YFSKHN, alters its interaction pattern with the conserved active site residues.

**Supplementary Figure S5.** Gel filtration elution profile of (A) *EcAhpC*<sub>1-186</sub>-YFSKHN, (B) *EcAhpC*<sub>S86A,T88A</sub>, (C) *EcTrx* and (D) *EcTrxR*. *EcAhpC*<sub>1-186</sub>-YFSKHN, *EcAhpC*<sub>S86A,T88A</sub>, and *EcTrx* were purified by Ni-NTA affinity- and size exclusion chromatography using a Superdex 75 column. In case of *EcTrxR*, a Superdex 200 gel filtration column was used. The volume of the shaded peak area was pooled and 3  $\mu$ l of pure eluted protein were applied on a 17% SDS gel to estimate its purity (*inset*).

(A)

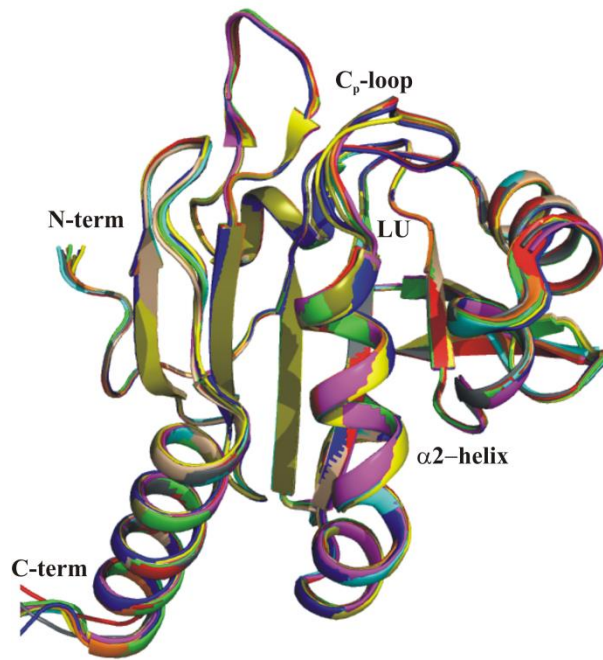

(B)

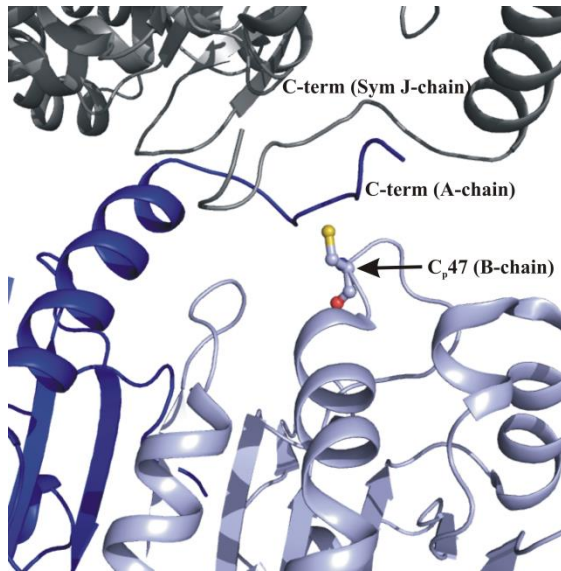

(C)

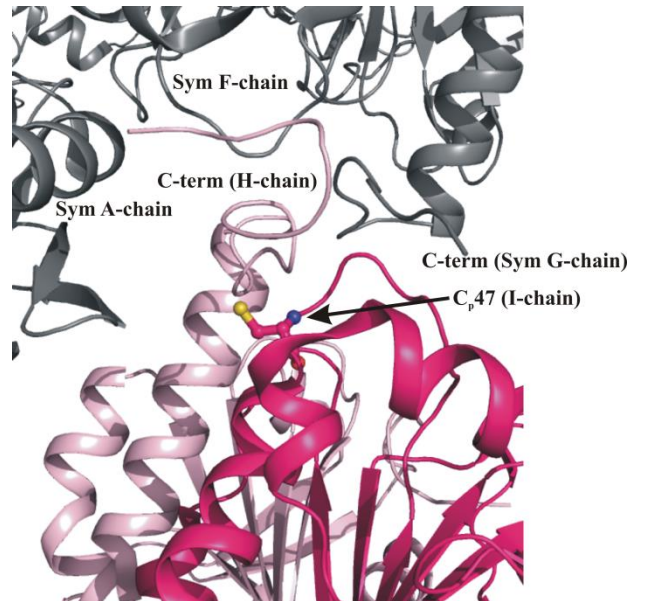

Supplementary Figure S1A-C

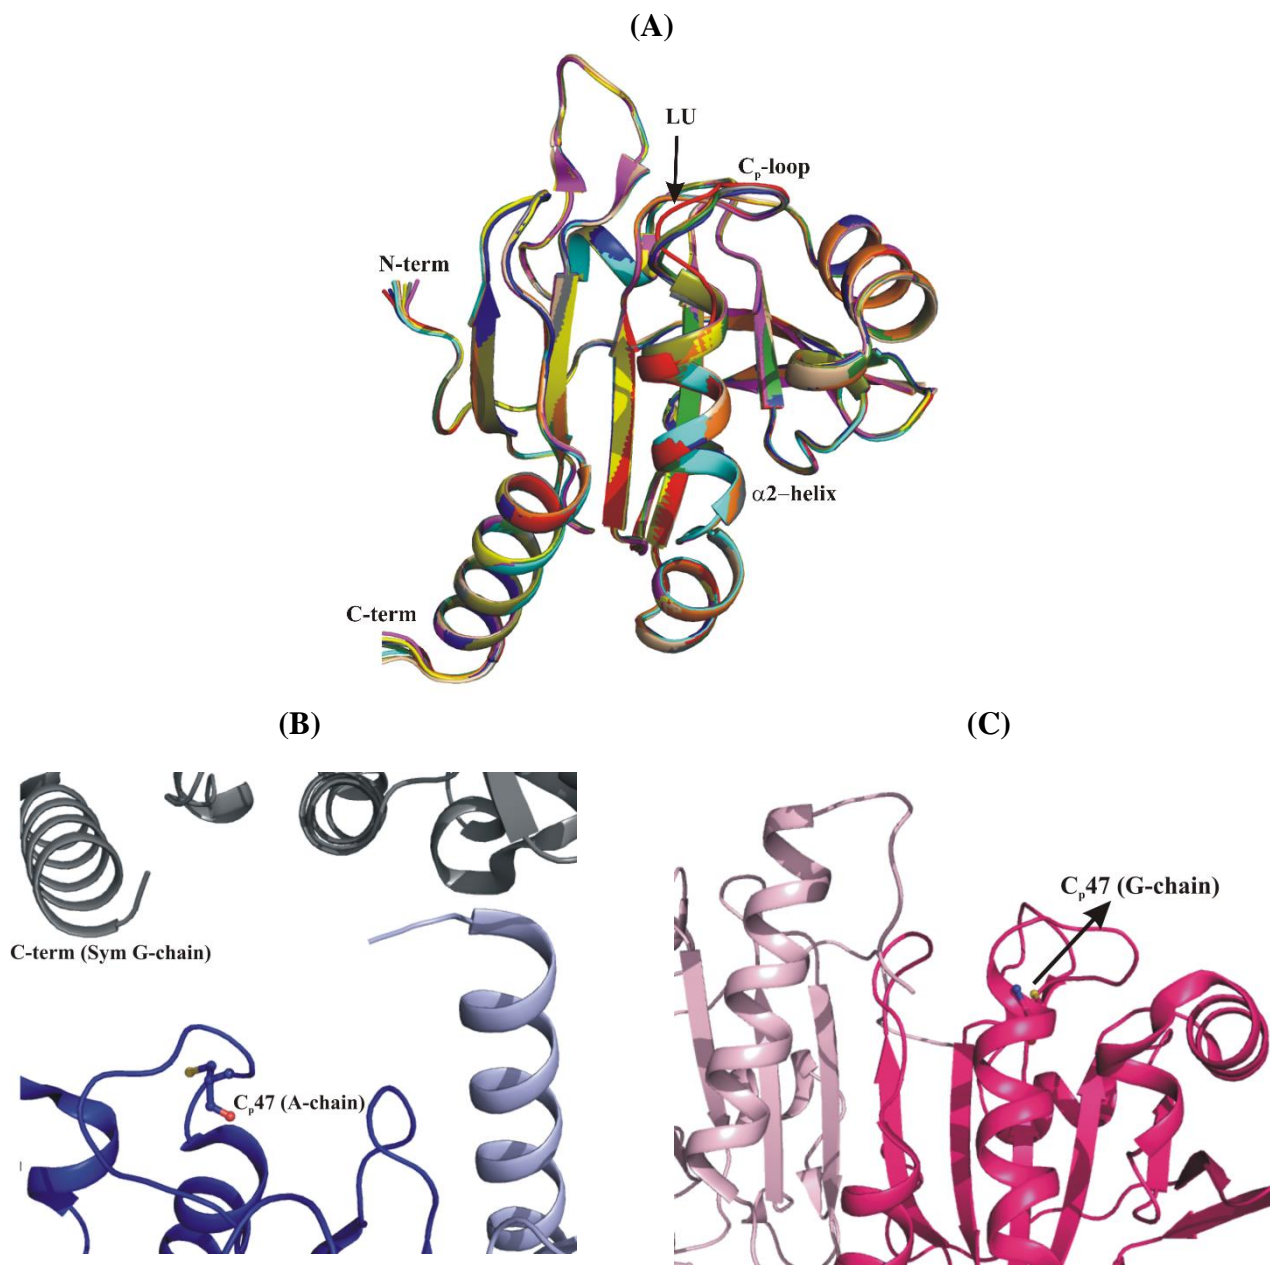

Supplementary Figure S2A-C

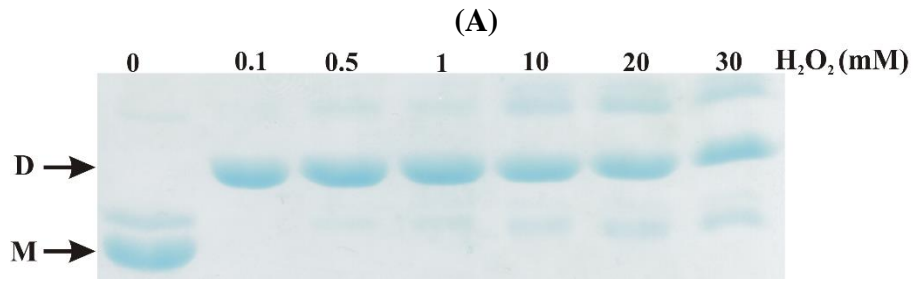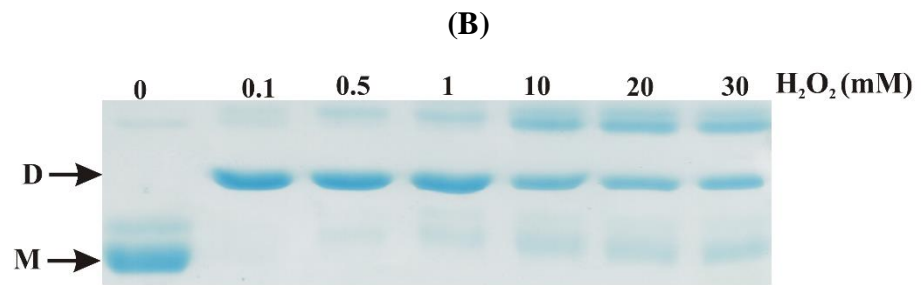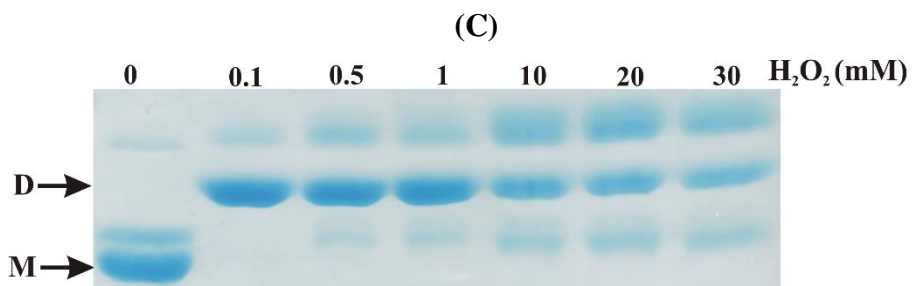

Supplementary Figure S3A-C

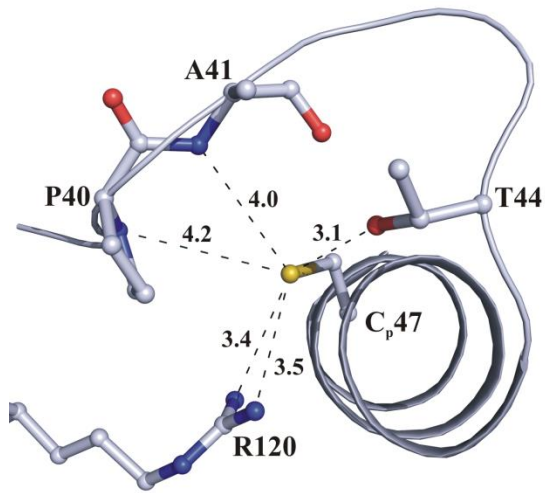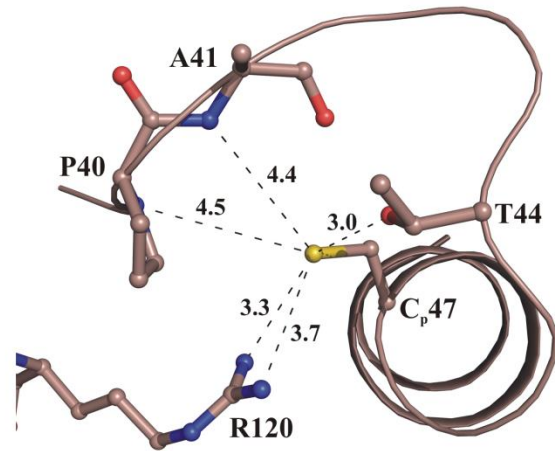

Supplementary Figure S4

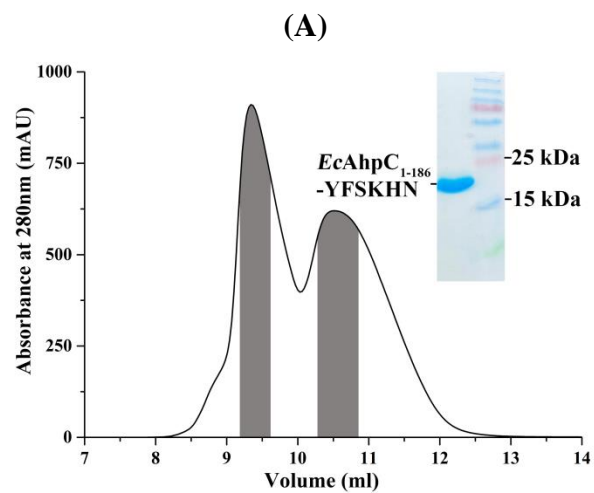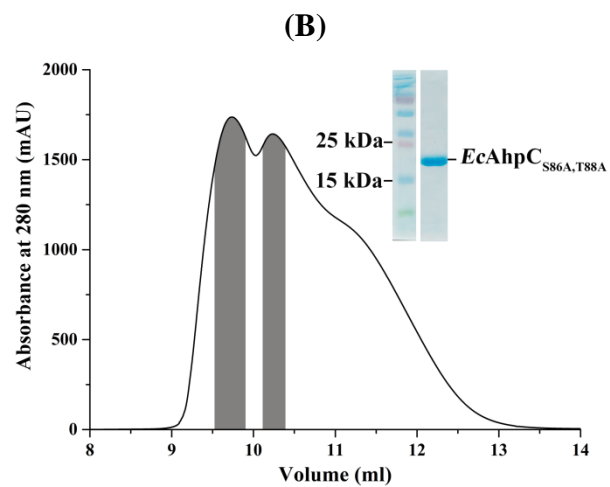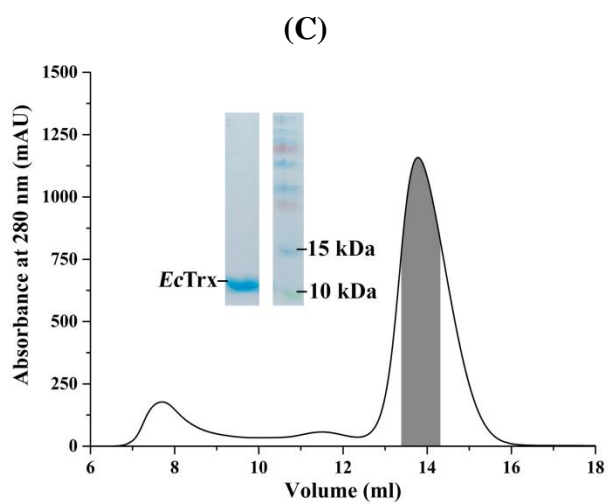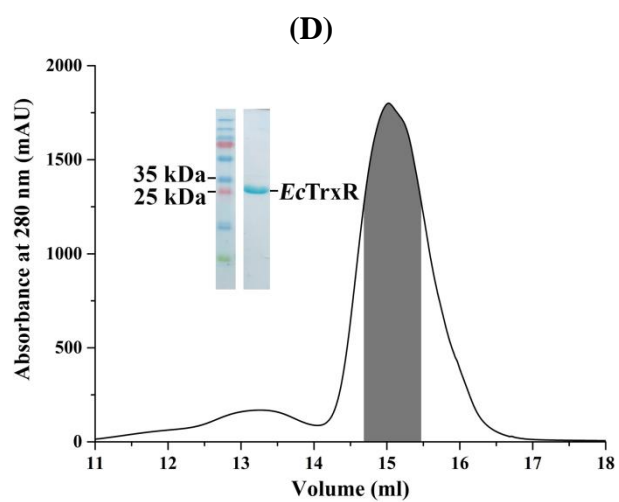

**Supplementary Figure S5A-D**



**Supplementary Table S1:** The backbone dihedral angles for active site residues at different conformations

| <b>Conformation</b> | <b>Residue</b> | <b>Phi (°)</b> | <b>Psi (°)</b> |
|---------------------|----------------|----------------|----------------|
| FF                  | P48            | -60.6          | -36.5          |
|                     | C47            | -49.2          | -53.6          |
|                     | V46            | -71.8          | -35.4          |
|                     | F45            | 115.8          | -61.7          |
| LU                  | P48            | -88.6          | 48.5           |
|                     | C47            | -55.5          | 132.7          |
|                     | V46            | -58.1          | 132.6          |
|                     | F45            | -79.2          | -21.3          |
| FF <sub>like</sub>  | P48            | -61.0          | -34.5          |
|                     | C47            | -64.3          | -38.9          |
|                     | V46            | -85.9          | -30.8          |
|                     | F45            | -86.7          | -35.6          |
| LU <sub>like</sub>  | P48            | -65.5          | 52.0           |
|                     | C47            | -53.1          | 150.4          |
|                     | V46            | -67.0          | 90.1           |
|                     | F45            | -99.9          | -15.3          |
